1 Segregation of Familial Risk of Obesity in NHANES Cohort Supports a  
2 Major Role for Large Genetic Effects in the Current Obesity Epidemic  
3  
4

5 Arthur B. Jenkins<sup>1,4\*</sup>, Marijka Batterham<sup>2</sup>, Lesley V. Campbell<sup>3,4</sup>

6 <sup>1</sup> School of Medicine, University of Wollongong, Wollongong NSW 2522 Australia

7 <sup>2</sup> Statistical Consulting Centre, School of Mathematics and Applied Statistics, University of  
8 Wollongong NSW 2522 Australia

9 <sup>3</sup> Diabetes Service, St Vincent's Hospital, Sydney, NSW 2010 Australia

10 <sup>4</sup> Diabetes and Metabolism Division, Garvan Institute of Medical Research, Darlinghurst, NSW 2010  
11 Australia

12 \* Correspondence

13 Corresponding Author

14 [ajenkins@uow.edu.au](mailto:ajenkins@uow.edu.au)

15

16 [Keywords: Segregation, Familial, Mendelian, Obesity, Gene-environment interactions,](#)

17

18

## 19 Abstract

20 The continuing increase in many countries in adult body mass index (BMI kg/m<sup>2</sup>) and its dispersion  
21 is contributed to by interaction between genetic susceptibilities and an increasingly obesogenic  
22 environment (OE). The determinants of OE-susceptibility are unresolved, due to uncertainty around  
23 relevant genetic and environmental architecture. We aimed to test the multi-modal distributional  
24 predictions of a Mendelian genetic architecture based on collectively common, but individually rare,  
25 large-effect variants and their ability to account for current trends in a large population-based sample.  
26 We studied publicly available adult BMI data (n = 9102) from 3 cycles of NHANES (1999, 2005,  
27 2013). A first degree family history of diabetes served as a binary marker (FH<sub>0</sub>/FH<sub>1</sub>) of genetic  
28 obesity susceptibility. We tested for multi-modal BMI distributions non-parametrically using kernel-  
29 smoothing and conditional quantile regression (CQR), obtained parametric fits to a Mendelian model  
30 in FH<sub>1</sub>, and estimated FH x OE interactions in CQR models and ANCOVA models incorporating  
31 secular time. Non-parametric distributional analyses were consistent with multi-modality and fits to a  
32 Mendelian model in FH<sub>1</sub> reliably identified 3 modes. Mode separation accounted for ~40% of BMI  
33 variance in FH<sub>1</sub> providing a lower bound for the contribution of large effects. CQR identified strong  
34 FH x OE interactions and FH<sub>1</sub> accounted for ~60% of the secular trends in BMI and its SD in  
35 ANCOVA models. Multimodality in the FH effect is inconsistent with a predominantly polygenic,  
36 small effect architecture and we conclude that large genetic effects interacting with OE provide a  
37 better quantitative explanation for current trends in BMI.

## 38 Introduction

39 The recent and continuing increase in the global mean adult BMI, first seen in high income countries,  
40 is now seen in most countries across a wide range of ethnic composition and socio-economic  
41 conditions (Di Cesare et al., 2016) and is accompanied by increases in measures of dispersion

## Segregation of Familial Obesity Risk

42 (Krishna et al., 2015; Silventoinen et al., 2017). Although BMI is known from family-based studies to  
43 be under strong genetic influences (Loos, 2018) population genetic backgrounds have been  
44 effectively constant over this time, implying that BMI trends are driven by change in environmental  
45 factors (obesogenic environment, OE). Evidence from twin studies, which demonstrate increased  
46 genetic variance over time, supports an important role for interactions between OE and genetic  
47 susceptibility (G x OE) on both mean and dispersion of BMI (Rokholm et al., 2011; Silventoinen et  
48 al., 2017), but how large a role is not yet known. Defining the role of G x OE in “epidemic” obesity,  
49 and hence of genetic susceptibility itself, is hindered by problems of measurement and modeling of  
50 interactions (Franks and McCarthy, 2016) and by uncertainty around both the genetic architecture  
51 (Loos, 2018) and the exact nature of the environmental drivers (Hall, 2018). Whether population  
52 susceptibility to OE is predominantly determined by a subgroup with high genetic susceptibility or is  
53 more evenly spread within populations is unresolved despite important implications for the  
54 management of obesity and related disorders at population and individual  
55 levels (Kivimaki et al., 2015; Krishna et al., 2015; Jenkins and Campbell, 2015; Razak et al., 2015).  
56  
57 The genetic variants responsible for obesity susceptibility remain largely unknown. Genome-wide  
58 association studies (GWAS) have identified significant associations with >200 markers with small  
59 effects on BMI (polygenes), together explaining only approximately 3-4 % of total variance  
60 compared to family-based heritabilities ( $h^2$ ) of 50-75% (Speakman et al., 2018). Few causative  
61 mechanisms responsible for these phenotypically weak associations are known (Loos, 2018). The  
62 sources of the  $h^2$  unaccounted for by GWAS are uncertain; suggestions include overestimation of  $h^2$ ,  
63 large numbers of common genetic variants with small, statistically insignificant effects on phenotypes  
64 (Locke et al., 2015; Khera et al., 2019) and importantly, candidates not tested in most GWAS.  
65 Among the latter are rare genetic variants with large phenotypic effects and G x OE interactions  
66 (Loos, 2018). Recently significant G x OE interactions have been detected in individual GWAS loci

## Segregation of Familial Obesity Risk

67 and in composite genetic risk scores, which however explain little of the missing component of  $h^2$

68 (Abadi et al., 2017; Nagpal et al., 2018).

69

70 A family history of diabetes (FH) is a potent, predominantly genetic (Hemminki et al., 2010;

71 Willemssen et al., 2015) risk factor for diabetes diagnosis (DM) and for obesity-related phenotypes

72 (Ghosh et al., 2010; Tirosh et al., 2011; Scott and Consortium, 2013; Jenkins et al., 2013) consistent

73 with the strong association between type 2 DM and overweight/obesity. Familial effects on obesity-

74 related phenotypes in adults are also predominantly genetic (Stryjecki et al., 2018; Silventoinen et al.,

75 2017), so to the extent that the DM generating FH is of type 2 (approximately 94% of DM in the US

76 population (Xu et al., 2018)), FH is a prevalent and readily obtained marker of genetic susceptibility

77 both to diabetes and to the obesity commonly preceding it. We have previously reported evidence

78 from a small sample of a multi-modal effect of FH on a composite adiposity index consistent with

79 segregation in families of discrete obesity risk (Jenkins et al., 2013). Polygenic risk scores (PRS)

80 based on large numbers of small effects are expected to be, and appear to be, unimodally-distributed

81 (Llewellyn et al., 2014; Rask-Andersen et al., 2017) and thus cannot account for familial segregation

82 of discrete risk. The present work is based on the alternative hypothesis that individually rare, but

83 collectively common, genetic variants with large phenotypic effects are the source of most of the

84 missing  $h^2$  and of most of  $G \times OE$ , and that their effects can be detected through analyses of

85 phenotypic segregation in high-risk families (Jenkins and Campbell, 2014).

86

87 The Continuous National Health and Nutrition Examination Survey (NHANES) is a continuing

88 (1999-) large-scale population-based survey incorporating an index of adiposity (Body Mass Index,

89 BMI) and first-degree FH ( $FH_0/FH_1$ ) together with potential covariates and confounders. Although

90 BMI has recognized limitations as an adiposity phenotype (Jenkins and Campbell, 2014; Müller et

91 al., 2018) it is the basis for most large-scale genetic studies and like other authors, we assume that a

92 large enough scale and appropriate modeling of covariates will reduce effects of imprecision and bias

93 (Speakman et al., 2018). We aimed to test in a large multi-cycle NHANES sample for the presence of  
94 familial segregation of genetic risk and to estimate the contribution of FH, and by extension all  
95 discrete genetic risk, to recent secular trends in adult BMI. The results support a predominant role for  
96 large genetic effects interacting with OE in the obesity “epidemic”.

97

## 98 **Subjects and Methods**

### 99 **Subjects**

100 We used data from the 1999-2000, 2005-2006 and 2013-2014 cycles of NHANES  
101 (<https://www.cdc.gov/nchs/nhanes/index.htm> accessed 25 Aug 2017). We extracted records for  
102 participants age 20-65 years with non-missing gender, race/ethnicity, BMI, diabetes family history  
103 (FH) and diabetes diagnosis data, and current smoking status if available. The definitions of two  
104 fields changed over the sampling period: 1) Diabetes family history was defined in terms of 1° and 2°  
105 relatives in 1999-2000 but by 1° relatives only in subsequent cycles. We recoded the 1999-2000  
106 diabetes family history data to conform to the later definition using the separately collected data for  
107 affected parents and siblings. 2) The self-identified race/ethnicity field (RIDRETH1) code was used  
108 excluding other races (OR) to maintain consistency of categories across cycles (Supplementary  
109 Methods). We excluded from the primary analyses subjects diagnosed with diabetes because of  
110 possible confounding by effects of either diabetes or diabetes therapies on BMI. The resulting data  
111 set is summarized in Table 1.

112 **Statistical analyses**

113 *Approach*

114 We treated the data as a convenience sample and took no account of the sampling weights provided  
115 by NHANES to permit nationally representative estimates. Our results are not intended to be  
116 representative of the US population.

117 Our primary analyses are based on non-parametric visualization (kernel-smoothing) and analyses  
118 (conditional quantile regression, CQR) of distributions requiring no prior distributional assumptions.  
119 Parametric fits to multimodal distributions were then used to quantify the contributions of the  
120 predicted large genetic effects model.  $FH_{(0.1)}$  is treated analytically as a binary genetic risk marker  
121 but the distribution of its effect across quantiles is interpreted in a Mendelian model in which  $FH_1$   
122 represents enrichment of a mixture of single and double carriers of risk variants. Calendar time is  
123 treated as a continuous surrogate of OE. Effects of OE interacting with FH were assessed in CQR  
124 models, and also in least-squares ANCOVA models using bootstrap resampling to minimize  
125 distributional assumptions in the calculation of effect size estimates and errors. All analyses were  
126 performed using R 3.6.1 (R Development Core Team, 2016).

127

128 *Summary statistics*

129 Heterogeneity of the samples across cycles was assessed by Chi square test for categorical variables  
130 and by one-way ANOVA for age. Effects on BMI were assessed by ANCOVA against continuous  
131 time ( $yr = \text{calendar start year} - 1999$ ). Effects on phenotype SD's were assessed by Bartlett's test in  
132 one-way ANOVA models.

133

134 *Adjustment*

135 Prior to analysis BMI was adjusted for effects of age, gender and race/ethnicity in a linear model (age  
136 + age<sup>2</sup> + race x gender). The adjustment model accounted for 4 % of the total variance in BMI  
137 (Supplementary Table S1).

138

139 *Distributions*

140 Visualization

141 The effect of FH on the distribution of adjusted BMI was visualized using kernel-smoothed density  
142 estimates by FH status (R base function density). The degree of smoothing is controlled by the  
143 bandwidth parameter (bw) which was obtained in the full non-diabetic data set (bw = 0.99) from a  
144 measure of the dispersion of the data (Sheather and Jones, 1991). This produces a continuous  
145 distribution function and is widely used to visualise features of potential interest which may be  
146 obscured in histograms. The credibility of the apparent effect of FH on the shape of the distribution  
147 was assessed by post-hoc analysis of density ratios (FH<sub>1</sub> / FH<sub>0</sub>) by quantiles (20) of the full sample.  
148 Mean density ratios with SEM were obtained by quantile by bootstrap resampling with replacement  
149 (1000 draws, stratified by FH status with resample sizes = strata sizes) and compared to the  
150 predictions of normal and log-normal mixture distributions characterised by the proportions, means  
151 and SD's in the sample stratified by FH status and cycle. Lack of fit to the mixture distributions was  
152 assessed by X<sup>2</sup> tests in 1/variance-weighted linear regressions.

153

154 Conditional Quantile Regression (CQR)

155 Conditional quantile regression is a powerful tool for analyzing the effect of covariates on  
156 distributions without assumptions of distributional shape. In contrast to ordinary least-squares (OLS)  
157 regression which characterizes effects on global features of a distribution, CQR analyses local effects

## Segregation of Familial Obesity Risk

158 of covariates independently at any specified quantiles and can detect variations in covariate effects  
159 across quantiles. Originating in econometrics (Koenker, 2017) it is now used in other areas including  
160 genetics (Briollais and Durrieu, 2014). In the CQR framework developed by Abadi et al (Abadi et al.,  
161 2017) for analysis of genomic markers, trends in effect sizes across quantiles represent interactions  
162 between genetic effects and unobserved environmental and/or genetic factors. We treat FH as a  
163 binary genetic risk marker ( $FH_0/FH_1$ ) and a linear trend in quantile regression coefficients ( $\beta_{1i}$ ) across  
164 quantiles ( $\tau_i$ ) represents summed linear interactions of FH with unobserved factors. We analysed the  
165 effects of FH on adjusted BMI by CQR using the R package quantreg. The effect of all interactions  
166 on the FH effect was tested in a 2 parameter linear model:

167 for each quantile  $\tau_i$  in  $y$ ,

$$168 \quad y(\tau_i | FH=fh) = \beta_{0i} + \beta_{1i} * FH$$

169 where  $y(\tau_i | FH=fh)$  = the  $i$ th quantile of adjusted BMI conditional on the value of FH (0,1), the  
170 intercept  $\beta_{0i}$  is the  $i$ th quantile value in  $FH_0$  and  $\beta_{1i}$  is the FH effect size in quantile  $i$ .

171

172 The interaction between FH and continuous calendar time was estimated in the ANCOVA model:

$$173 \quad y(\tau_i | FH=fh) = \beta_{0i} + \beta_{1i} * FH + \beta_{2i} * yr + \beta_{3i} * FH * yr$$

174 where  $yr$  = cycle start year – 1999,  $\beta_{0i}$  is the  $i$ th quantile value in  $FH_0$  at  $yr = 0$  and  $\beta_{2i}$  and  $\beta_{3i}$  are CQR  
175 coefficients for time and time\*FH interaction effects in quantile  $i$ . The coefficients for the time-  
176 related effects represent the effects in  $FH_0$  ( $\beta_{2i}$ ) and the additional effects in  $FH_1$  ( $\beta_{3i}$ ) so that the  
177 coefficients for total time effects in  $FH_1 = \beta_{2i} + \beta_{3i}$ .

178

179 Equality of CQR parameter effect sizes across quantiles was tested using the `anova.rq` function in the  
180 R package `quantreg`.

181



## Segregation of Familial Obesity Risk

182 The strengths of the CQR effects across quantiles were also assessed in linear meta-regression  
183 analyses of relationships between quantile coefficients  $\beta_{1-3i}$  and quantiles using the R package  
184 metafor (Abadi et al., 2017). Regression coefficients ( $\beta_{MR}$ ) with SEM are reported in units of  $\text{kg}\cdot\text{m}^{-2}$   
185 over the full quantile scale (0-1). The structure of the FH effects in relation to the multi-modal  
186 Mendelian hypothesis was assessed in an analysis of residuals from linear OLS fits of  $\beta_{1i}$  to  $\beta_{0i}$  with  
187 Durbin-Watson tests for residual 1<sup>st</sup> order autocorrelation (function `durbinWatsonTest`  
188 in the R package `car`).

189 Parametric fits

190 We obtained fits to a 3-component normal mixture distribution representing a simple Mendelian  
191 model of fixed genetic effect using an expectation-maximization algorithm (`normalmixEM` function  
192 in the R package `mixtools`). The models are characterised by the fitted means ( $\mu_i$ ), standard deviations  
193 ( $\sigma_i$ ) and mixing proportions ( $\lambda_i$ ) of the three component distributions. Full model fits were obtained  
194 in  $\text{FH}_1$  but were not obtainable in  $\text{FH}_0$  or  $\text{DM}_1$  groups and we constrained  $\mu_i$  in those groups to values  
195 estimated in  $\text{FH}_1$  in order to obtain comparable estimates of  $\sigma_i$  and  $\lambda_i$ . Risk allele frequencies ( $q$ )  
196 under an additive Mendelian model of large genetic effects were calculated from the fitted  $\lambda_i$ :

197 
$$q = 0.5*\lambda_2 + \lambda_3$$

198 where  $\lambda_2$  and  $\lambda_3$  represent the proportions of carriers of 1 and 2 risk alleles respectively. Within-  
199 sample consistency of calculated  $q$  across the three groups analysed was assessed by comparing  
200 fitted  $q_{\text{FH}_1}$  with the prediction from random mating of  $\text{DM}_1$  into the full sample:

201 
$$\text{predicted } q_{\text{FH}_1} = (q_{\text{DM}} + n\text{-weighted mean}(q_{\text{DM}}, q_{\text{FH}_1}, q_{\text{FH}_0}))/2$$

202 *Secular trends*

203 Effects of diabetes family history status (FH<sub>0</sub>, FH<sub>1</sub>) and continuous time (yr = calendar start year -  
204 1999) on adjusted BMI and its standard deviation (SD) were assessed in ANCOVA models of the  
205 form:

$$206 \quad y = \beta_0 + \beta_1 * FH + \beta_2 * yr + \beta_3 * FH * yr$$

207 where y = adjusted BMI mean or SD by FH status (0/1) and cycle, and yr = cycle start year – 1999.

208 Each OLS fit estimated 4 parameters from the 6 data points. Mean parameter estimates with 95% CI  
209 were obtained by bootstrap resampling with replacement (1000 draws stratified by FH status and  
210 cycle with resample sizes = strata sizes).

211

212 *Comparison of cross-sectional and secular trend effects*

213 Effects of FH on BMI distribution and on secular trends in BMI were compared by calculating the  
214 contribution (%) of FH<sub>1</sub> to the effect in the full non-diabetic sample for calculated risk allele  
215 frequency (q%) and to the slope (β%) of the relationships between time and BMI in ANCOVA model  
216 described above. Mean (± SEM where possible) q% and β% were calculated in the relevant bootstrap  
217 samples.

218

219 **Results**

220 **Participant characteristics**

221 Data from 9102 non-diabetic subjects met the inclusion criteria, approximately equally distributed  
222 across the 3 cycles. Gender balance varied little but there was a cycle effect in race/ethnicity, most  
223 obvious in the reduced representation of MA in the two later cycles. Average age varied across cycles  
224 but not its SD, while adjusted BMI and its SD showed linear trends with cycle time. FH<sub>1</sub> prevalence

225 was higher in the two later cycles compared to 1999-2000 as was DM<sub>1</sub> prevalence. Current smoking  
226 status was predominantly missing in the data (55%) and was not included in the BMI adjustment  
227 model. However smoking status was not related to FH status whether analysed in the full data ( $\chi^2 =$   
228 2.80, 2 df,  $p = 0.25$ ) or in those with non-missing smoking status ( $\chi^2 = 0.43$ , 1 df,  $p = 0.51$ ), hence is  
229 unlikely to confound analyses of FH effects. The mean age at diagnosis of DM (43.6 yr) is consistent  
230 with predominant type 2 DM in the sample.

### 231 **Distributions**

#### 232 Visualization

233 Adjusted BMI in the non-diabetic sample showed an apparently unimodal distribution, right-skewed  
234 compared to a normal model and closer to a log-normal model (Fig 1A). When visualized by FH  
235 status (Fig 1B) the predicted multimodality in FH<sub>1</sub> was indicated with modes in the normal weight,  
236 overweight and obese regions of the BMI distribution. In contrast FH<sub>0</sub> showed an apparently  
237 unimodal distribution. A difference in shape between the two groups was supported by the analysis of  
238 density ratios (Fig 1B inset) in which models based on mixtures (FH x cycle) of either normal or log-  
239 normal distributions did not provide adequate fits to the data ( $p \leq 0.001$ ). BMI distribution in the  
240 diabetic sample appeared to be depleted in the lower mode and enriched in the upper modes  
241 compared to FH<sub>1</sub> (Fig 1C).

242

#### 243 CQR

244 Analysis of the effect of FH status alone on the shape of the BMI distribution using CQR  
245 demonstrated increasing FH effect size at higher levels of BMI ( $\beta_{1MR} = 2.2 \pm 0.2$  (SEM)  $\text{kg}\cdot\text{m}^{-2}$  Fig  
246 2A, main panel), indicating strong interactions between FH<sub>1</sub> and other variables not included in the  
247 model. FH<sub>1</sub> effect size ranged from  $< 1 \text{ kg}/\text{m}^2$  in the lower quantiles to  $\sim 3 \text{ kg}/\text{m}^2$  in the upper  
248 quantiles, substantially different in both regions to the OLS estimate ( $1.7 \text{ kg}/\text{m}^2$ ). Inclusion of

## Segregation of Familial Obesity Risk

249 calendar time in the two-way model weakened the trend in  $\beta_1$  across quantiles ( $\beta_{1MR} = 1.5 \pm 0.3$ , Fig  
250 2B main panel) and exposed significant OLS effects and trends across quantiles for main ( $\beta_{2MR} =$   
251  $0.07 \pm 0.02$ ) and interaction ( $\beta_{3MR} = 0.11 \pm 0.03$ ) effects of time (Fig 2C-D, main panels). The total  
252 OLS and MR interaction effect sizes in FH<sub>1</sub> ( $\beta_{2OLS} + \beta_{3OLS} = 0.11 \pm 0.03$  (SE),  $\beta_{2MR} + \beta_{3MR} = 0.18 \pm$   
253  $0.04$ ) were approximately double those in FH<sub>0</sub> ( $\beta_{2OLS}$ ,  $\beta_{2MR}$ , Fig 2C). The analysis supports the  
254 conclusion that calendar time is a strong surrogate of OE interacting with genetic factors as  
255 represented by FH status, and that susceptibility to OE increases with increasing BMI in both groups  
256 but more strongly in FH<sub>1</sub>.

257 While the overall MR relationships between  $\beta_1$  and quantiles in both models were approximately  
258 linear (Fig 2A,B) there was strong evidence for additional non-linear structure in the OLS analysis of  
259  $\beta_{1i}$  against  $\beta_{0i}$  (insets Fig 2A,B). The linear models provided good fits (one-way: slope =  $0.15 \pm$   
260  $0.003$  (SE),  $R^2 = 0.98$ ; two-way: slope =  $0.10 \pm 0.01$ ,  $R^2 = 0.86$ ) but residual sequential structure was  
261 apparent in both models, confirmed by tests of autocorrelation in residuals ( $p_{DW} \leq 0.002$ ). The  
262 pattern of residuals in the two-way model (Fig 2B inset), adjusted for time-related effects, shows  
263 clear signs of discrete effects of FH<sub>1</sub> on the distribution of adjusted BMI with distinct peaks in the  
264 lower, middle and upper regions of the distribution. This pattern in the conditional quantile  
265 coefficients does not map directly onto the unconditional quantile plots in Fig 1B, but does highlight  
266 similar regions in the distribution, and permits the conclusion that FH<sub>1</sub> has discrete, not continuous  
267 effects on BMI.

### 268 Parametric analysis

269 The distribution of BMI in FH<sub>1</sub> (Fig 1B) and the discrete pattern in the FH<sub>1</sub> effect by CQR (Fig 2B  
270 inset) appear consistent with a simple Mendelian model and fitting a 3-component normal  
271 distribution model to the FH<sub>1</sub> data resulted in robust estimates of component means (Fig 3A) and  
272 mixing coefficients and SDs (Table 2). Approximately 50% of FH<sub>1</sub> occupied the upper two modes  
273 and separation between modes accounted for approximately 40% of the total variance in adjusted

274 BMI with the remainder assigned to dispersion within modes (Fig 2B). Under a Mendelian model the  
275 variance due to mode separation represents a lower bound on the contribution of large effects as some  
276 of the dispersion within modes represents variance in effect sizes of individual contributing causal  
277 loci (see Discussion) which will contribute to the ~60% of variance assigned to within-modes.  
278 Estimates of component SDs and mixing proportions with component means, constrained for  $FH_0$  and  
279  $DM_1$  to those identified in the  $FH_1$  data (Table 2), support enrichment in the two upper components in  
280  $FH_1$  compared to  $FH_0$  (48% vs. 33%) and more strongly in  $DM_1$  (72%). Predicted risk allele  
281 frequencies in  $FH_1$  ( $q$  - Table 2) express these distributional properties in Mendelian terms and show  
282 within-sample consistency in that  $q_{FH_1}$  predicted from random mating of  $DM_1$  (0.37) is not different  
283 to the fitted estimate ( $0.30 \pm 10$ ).

284

### 285 **Secular trends**

286 Adjusted BMI mean (Fig 2A) and SD (Fig 2B) increased over the sampling period significantly faster  
287 in  $FH_1$  compared to  $FH_0$  in the bootstrapped ANCOVA model, and estimates of  $\beta$  and  $\Delta\beta$  in the mean  
288 data were indistinguishable from the OLS estimates provided by the CQR analysis (Fig 2C,D).  
289 Similar results were obtained with log-transformed BMI (Supplementary Fig S2).  $FH_1$  accounted for  
290 62% of the BMI mean trend and 60% of the BMI SD trend in this sample over the period 1999-2014,  
291 effects similar in magnitude to the estimated  $FH_1$  contribution to the sample risk allele frequency  
292 (50%, Supplementary Table S2).

293

## 294 **Discussion**

### 295 **Summary**

296 We tested the prediction of segregation of discrete effects of FH on adult BMI (Jenkins et al., 2013),  
297 modeled as modes of distribution, and estimated the contribution of  $FH_1$  to recent trends in BMI

298 mean and dispersion in a large population-based sample. The results support a predominant role in  
299 the recent obesity "epidemic" for rare genetic variants with large effects interacting with OE.

300

### 301 **Segregation of genetic susceptibility**

302 The non-parametric analysis provided evidence for a multi-modal distribution in the  $FH_1$  group  
303 consistent with the prediction of segregation of large genetic effects in families (Jenkins et al., 2013).  
304 Multi-modality was supported by the analysis of density differences between  $FH_1$  and  $FH_0$  by  
305 unconditional quantiles (Fig 1B) and by evidence of discrete signals in the OLS analysis of CQR  
306 coefficients (Fig 2A&B insets). The two upper peaks in Fig 2B inset are consistent with the predicted  
307 Mendelian effects of large effect variants on BMI but the potential lower peak is unexpected and may  
308 reflect the presence of type 1 diabetes family history in  $FH_1$  group. Individuals with type 1 diabetes  
309 often present with BMI in the underweight ( $<18.5$ ) – normal range ( $<25$ ) (Manyanga et al., 2016) but  
310 a genetic basis for this has not been established.

311 Polygenic risk scores (PRS) in population-based samples are expected to be unimodally-distributed,  
312 and appear to be so (Llewellyn et al., 2014; Rask-Andersen et al., 2017). Any elevated polygenic  
313 obesity risk in  $DM_1$  will dilute into the mating population resulting in a right-shifted distribution in  
314  $FH_1$  compared to  $FH_0$ , not discrete effects. Alternative explanations for multi-modality might be  
315 discrete stratification of OE components not captured by calendar time which seems unlikely, or un-  
316 modeled interactions between FH and other covariates. Un-modeled interactions between FH and  
317 stratified residual confounders may exist and contribute but we found no evidence for this in plots of  
318 distributions by gender and race/ethnicity (Supplementary Fig S1) or in an analysis of smoking status  
319 against FH. Discrete inheritance of genetic variants with large effects is the most likely explanation  
320 for multi-modality in the FH effects on the BMI distribution .

321

## Segregation of Familial Obesity Risk

322 Approximately 40% of the adjusted BMI variance in  $FH_1$  was accounted for by between-modes  
323 variance (Fig 3B) but this represents a lower bound since the identified modes are likely to be  
324 synthetic ie composed of a range of effect sizes due to rare variants at different loci. Indications of  
325 fine structure within the broad central peak (Fig 2B inset) are suggestive. Examples of rare variants  
326 with large effects on BMI in adults ( $\beta$ ) are known from studies of candidate genes and monogenic  
327 obesity loci (Jenkins and Campbell, 2014) while more recently a common variant in Samoans (EAF =  
328 0.26,  $\beta \approx 1.4 \text{ kg/m}^2$ ), very rare in other populations (Minster et al., 2016), and an African-specific  
329 rare variant (EAF = 0.008,  $\beta = 4.6 \text{ kg/m}^2$ ) undetected in Europeans and Asians (Chen et al., 2017)  
330 have been identified by GWAS. Overall,  $\beta$  in these nine examples ranges from 1.4- 9  $\text{kg/m}^2$  and a  
331 similar range in effect sizes in the NHANES sample would contribute substantially to the within-  
332 mode variance estimated here. A combination of within-subject variance (~5% (Wormser et al.,  
333 2013)) with polygenic variance (~ 5% (Loos, 2018)) sets a lower bound for within-modes variance  
334 and hence the upper bound for between modes, implying that between 40% and 90% of total variance  
335 in  $FH_1$  may be attributed to large genetic effects.

336

### 337 **G x OE**

338  $FH_1$  is a prevalent (36%) and powerful determinant of the rate of change of mean BMI and its  
339 dispersion over time in the ANCOVA models, accounting for 62% of the BMI trend and 60% of the  
340 BMI SD trend in this sample over 1999-2014. Consistent results were obtained in the CQR models  
341 with  $\beta_{OLS}$  and  $\beta_{MR}$  in  $FH_1$  approximately double those in  $FH_0$ . Under a polygenic model the familial  
342 risk would be distributed normally over  $FH_1$  which would then be a marker of a large fraction of the  
343 at-risk population. However under the Mendelian model supported here genetic risk would segregate  
344 in families and only approximately 50% of  $FH_1$  would acquire the excess familial risk and only ~18%  
345 of the sample would then account for ~60% of the trends. Individuals with a family history  $DM_1$  must  
346 represent a fraction of individuals with elevated genetic obesity risk and it is likely that the

347 remainder, particularly those with a family history of obesity without DM, would substantially  
348 increase the genetic component of the trends consequent to the high heritability of BMI (Stryjecki et  
349 al., 2018). This Mendelian model is internally consistent in estimates of risk allele frequencies ( $q$ ) in  
350 FH<sub>1</sub>, FH<sub>0</sub> and DM<sub>1</sub> (Table 2) and in comparisons of FH<sub>1</sub> effect sizes in cross section ( $q$ , ~50%) and  
351 over time ( $\beta$ , ~60%) (Supplementary Table S2). Our results support the proposition that the largest  
352 part, and perhaps all, recent trends in mean and dispersion of BMI are due to a minor subset of  
353 individuals with elevated genetic susceptibility to OE.

354

### 355 **Limitations**

356 The design and interpretation of fits to parametric mixture distribution models involves choices  
357 concerning the number of components, parameter starting values and algorithms, and fit to a specific  
358 model cannot be taken in isolation as support for its structural validity. We base our choice and  
359 structural interpretation of 3-component normal mixture model fits and parameters on the *a priori*  
360 hypothesis of Mendelian segregation of obesity risk in families (Jenkins et al., 2013) supported by the  
361 non-parametric distributional plots (Fig 1B,C) and CQR analysis (Fig 2A,B insets). Like Abadi et al  
362 (Abadi et al., 2017), we interpret interactions in the CQR analysis as predominantly G x OE although  
363 a contribution from G x G interactions cannot be excluded. Our interpretation is supported by the  
364 effects on the interaction of including calendar time in the CQR model (Fig 2B). Other limitations  
365 discussed above include our inability to exclude discreet stratification of OE and the possible  
366 influence of unmeasured/unknown confounders of FH effects.

367

### 368 **Conclusions**

369 We conclude that a Mendelian model of individually rare but collectively common genetic risk  
370 variants with large effects interacting with OE provides a plausible quantitative explanation for recent



371 trends in obesity and should be favored over a predominantly polygenic model which does not. The  
372 evidence for a predominant role for polygenes (Khera et al., 2019) can appear to be strong (eg  
373 “Polygenic obesity is the most common form of obesity in modern societies...” (Albuquerque et al.,  
374 2017)) but recent interpretations seek to explain the still missing heritability in obesity in terms of  
375 unidentified large genetic effects and G x OE (Saeed et al., 2018; Loos, 2018) and recommend a  
376 renewed focus on family-based designs and on specific populations in which large effect variants  
377 may be enriched and identified (Minster et al., 2016; Chen et al., 2017). Our results strengthen that  
378 view by showing that a model based on unidentified segregating variants with large effects  
379 interacting with OE can account for the largest part of the secular trend in BMI and its dispersion in a  
380 large population-based sample.

381

## 382 Conflict of Interest

383 The authors declare that the research was conducted in the absence of any commercial or  
384 financial relationships that could be construed as a potential conflict of interest.

385

## 386 Author Contributions Statement

387 All authors contributed to the study design. AJ extracted and analysed the data in consultation  
388 with MB. AJ and LC wrote the first draft of the manuscript. All authors contributed to manuscript  
389 revision and editing.

390

391

392

## 393 References

- 394 Abadi, A. et al. (2017) Penetrance of Polygenic Obesity Susceptibility Loci across the Body Mass  
395 Index Distribution. *Am J Hum Gen*, **101**, 925-938.
- 396 Albuquerque, D., Nóbrega, C., Manco, L. & Padez, C. (2017) The contribution of genetics and  
397 environment to obesity. *Br Med Bull*, **123**, 159-173.
- 398 Briollais, L. & Durrieu, G. (2014) Application of quantile regression to recent genetic and -omic  
399 studies. *Hum Genet*, **133**, 951-966.
- 400 Chen, G. et al. (2017) Genome-wide analysis identifies an African-specific variant in SEMA4D  
401 associated with body mass index. *Obesity*, **25**, 794-800.
- 402 Di Cesare, M. et al. (2016) Trends in adult body-mass index in 200 countries from 1975 to 2014: a  
403 pooled analysis of 1698 population-based measurement studies with 19.2 million participants.  
404 *Lancet*, **387**, 1377-1396.
- 405 Franks, P.W. & McCarthy, M.I. (2016) Exposing the exposures responsible for type 2 diabetes and  
406 obesity. *Science*, **354**, 69-73.
- 407 Ghosh, A., Liu, T., Khoury, M.J. & Valdez, R. (2010) Family History of Diabetes and Prevalence of  
408 the Metabolic Syndrome in U.S. Adults without Diabetes: 6-Year Results from the National  
409 Health and Nutrition Examination Survey (1999-2004). *Public Health Genom*, **13**, 353-359.
- 410 Hall, K.D. (2018) Did the Food Environment Cause the Obesity Epidemic? *Obesity*, **26**, 11-13.
- 411 Hemminki, K., Li, X., Sundquist, K. & Sundquist, J. (2010) Familial risks for type 2 diabetes in  
412 Sweden. *Diabetes Care*, **33**, 293-297.
- 413 Jenkins, A.B., Batterham, M., Samocha-Bonet, D., Tonks, K., Greenfield, J.R. & Campbell, L.V.  
414 (2013) Segregation of a latent high adiposity phenotype in families with a history of type 2

- 415 diabetes mellitus implicates rare obesity-susceptibility genetic variants with large effects in  
416 diabetes-related obesity. *PLoS One*, **8**, e70435.
- 417 Jenkins, A.B. & Campbell, L.V. (2014) Future management of human obesity: understanding the  
418 meaning of genetic susceptibility. *Adv Genomics Genet*, **4**, 219-232.
- 419 Jenkins, A.B. & Campbell, L.V. (2015) Variation in Genetic Susceptibility Drives Increasing  
420 Dispersion of Population BMI. *Am J Clin Nutr*, **101**, 1308.
- 421 Joyner, M.J., Paneth, N. & Ioannidis, J.P. (2016) What Happens When Underperforming Big Ideas in  
422 Research Become Entrenched? *JAMA*, **316**, 1355-1356.
- 423 Khera, A.V. et al. (2019) Polygenic Prediction of Weight and Obesity Trajectories from Birth to  
424 Adulthood. *Cell*, **177**, 587-596.e9.
- 425 Kivimaki, M., Stenholm, S. & Kawachi, I. (2015) The widening BMI distribution in the United  
426 States. *Am J Clin Nutr*, **101**, 1307-1308.
- 427 Koenker, R. (2017) Quantile Regression: 40 Years On. *Ann Rev of Econ*, **9**, 155-176.
- 428 Krishna, A., Razak, F., Lebel, A., Davey Smith, G. & Subramanian, S.V. (2015) Trends in group  
429 inequalities and interindividual inequalities in BMI in the United States, 1993–2012. *Am J Clin*  
430 *Nutr*, **101**, 598-605.
- 431 Llewellyn, C.H., Trzaskowski, M., Plomin, R. & Wardle, J. (2014) From modeling to measurement:  
432 developmental trends in genetic influence on adiposity in childhood. *Obesity*, **22**, 1756-1761.
- 433 Locke, A.E. et al. (2015) Genetic studies of body mass index yield new insights for obesity biology.  
434 *Nature*, **518**, 197-206.
- 435 Loos, R.J. (2018) The genetics of adiposity. *Curr Opin Genet Dev*, **50**, 86-95.
- 436 Manyanga, T., Sellers, E.A.C., Wicklow, B.A., Doupe, M. & Fransoo, R. (2016) Is the change in  
437 body mass index among children newly diagnosed with type 1 diabetes mellitus associated with  
438 obesity at transition from pediatric to adult care. *Pediatric Diabetes*, **17**, 599-607.

- 439 Minster, R.L. et al. (2016) A thrifty variant in CREBRF strongly influences body mass index in  
440 Samoans. *Nat Genet*, **48**, 1049-1054.
- 441 Müller, M.J. et al. (2018) The case of GWAS of obesity: does body weight control play by the rules.  
442 *Int J Obes*,
- 443 Nagpal, S., Gibson, G. & Marigorta, U. (2018) Pervasive Modulation of Obesity Risk by the  
444 Environment and Genomic Background. *Genes*, **9**, doi: 10.3390/genes9080411.
- 445 R Development Core Team (2016) R: A Language and Environment for Statistical Computing. R  
446 Foundation for Statistical Computing, Vienna, Austria. URL <https://www.R-project.org/>,
- 447 Rask-Andersen, M., Karlsson, T., Ek, W.E. & Johansson, A. (2017) Gene-environment interaction  
448 study for BMI reveals interactions between genetic factors and physical activity, alcohol  
449 consumption and socioeconomic status. *PLoS Genet*, **13**, e1006977.
- 450 Razak, F., Smith, G.D., Krishna, A., Lebel, A. & Subramanian, S.V. (2015) Variation in genetic  
451 susceptibility drives increasing dispersion of population BMI Reply. *Am J Clin Nutr*, **101**,  
452 1308-1309.
- 453 Rokholm, B., Silventoinen, K., Ängquist, L., Skytthe, A., Kyvik, K.O. & Sørensen, T.I. (2011)  
454 Increased genetic variance of BMI with a higher prevalence of obesity. *PLoS One*, **6**, e20816.
- 455 Saeed, S., Arslan, M. & Froguel, P. (2018) Genetics of Obesity in Consanguineous Populations:  
456 Toward Precision Medicine and the Discovery of Novel Obesity Genes: Obesity and  
457 Consanguinity. *Obesity*, **26**, 474-484.
- 458 Scott, R.A. & Consortium, I. (2013) The link between family history and risk of type 2 diabetes is not  
459 explained by anthropometric, lifestyle or genetic risk factors: the EPIC-InterAct study.  
460 *Diabetologia*, **56**, 60-69.
- 461 Sheather, S.J. & Jones, M.C. (1991) A Reliable Data-Based Bandwidth Selection Method for Kernel  
462 Density Estimation. *J Roy Stat Soc B Met*, **53**, 683-690.

## Segregation of Familial Obesity Risk

- 463 Silventoinen, K. et al. (2017) Differences in genetic and environmental variation in adult BMI by sex,  
464 age, time period, and region: an individual-based pooled analysis of 40 twin cohorts. *Am J Clin*  
465 *Nutr*, **106**, 457-466.
- 466 Speakman, J.R., Loos, R.J.F., O’Rahilly, S., Hirschhorn, J.N. & Allison, D.B. (2018) GWAS for  
467 BMI: a treasure trove of fundamental insights into the genetic basis of obesity. *Int J Obes*, **42**,  
468 1524-1531.
- 469 Stryjecki, C., Alyass, A. & Meyre, D. (2018) Ethnic and population differences in the genetic  
470 predisposition to human obesity. *Obes Rev*, **19**, 62-80.
- 471 Tirosh, A. et al. (2011) Adolescent BMI trajectory and risk of diabetes versus coronary disease. *N*  
472 *Engl J Med*, **364**, 1315-1325.
- 473 Willemssen, G. et al. (2015) The Concordance and Heritability of Type 2 Diabetes in 34,166 Twin  
474 Pairs From International Twin Registers: The Discordant Twin (DISCOTWIN) Consortium.  
475 *Twin Res Hum Genet*, **18**, 762-771.
- 476 Wormser, D., White, I.R., Thompson, S.G. & Wood, A.M. (2013) Within-person variability in  
477 calculated risk factors: Comparing the aetiological association of adiposity ratios with risk of  
478 coronary heart disease. *Int J Epidemiol*, **42**, 849-859.
- 479 Xu, G. et al. (2018) Prevalence of diagnosed type 1 and type 2 diabetes among US adults in 2016 and  
480 2017: population based study. *BMJ*, **362**, k1497.

481

482

483

## 484 Figure legends

485 Figure 1: Distribution of adjusted BMI in non-diabetic ( $DM_0$ ) and diabetic ( $DM_1$ ) participants in  
486 combined NHANES 1999-2000, 2005-2006 and 2013-2014 cycles. A) Full non-diabetic sample  
487 ( $n=9102$ ) binned by quantiles ( $n=20$ ) with superimposed kernel-smoothed and fitted densities in  
488 normal and log-normal models. B) Main: kernel-smoothed adjusted BMI density by FH status. Inset:  
489 density ratios ( $FH_1 / FH_0$ )  $\pm$  SEM obtained by bootstrap resampling by quantiles of the full sample  
490 compared to predictions of normal (solid line) and log-normal (dotted line) mixture models with p  
491 associated with lack-of-fit testing ( $p_{lof}$ ). C) Kernel -smoothed adjusted BMI density in non-diabetic  
492  $FH_1$  ( $n=3297$ ) compared to diabetic participants ( $n=793$ ).

493 Figure 2: Conditional quantile regression effects of diabetes family history (FH) on adjusted BMI in  
494 non-diabetic participants in models consisting of FH alone (A) and in interaction with continuous  
495 calendar time (B-D). The main panels show the effect sizes ( $\beta_{1-3}$ ) by quantile with 95% CI (grey-  
496 shaded area), the OLS estimate of the average effect (solid green line) with 95% CI (dotted green  
497 lines) with p-values ( $p_{ANOVA}$ ) from anova tests for equality of  $\beta_i$  across quantiles and the meta-  
498 regression fits  $\pm$  95% CI (magenta lines) with  $\beta_{MR} \pm$  SEM. The insets in panels A and B show the  
499 patterns of residuals ( $\Delta\beta_{1i}$ )  $\pm$  residual SEM from linear OLS fits of  $\beta_{1i}$  ( $FH_1$ ) to  $\beta_{0i}$  ( $FH_0$ ) with 95% CI  
500 on the fits (dotted lines) around the lines  $\Delta\beta_1 = 0$  representing perfect fits, and with the p value ( $p_{DW}$ )  
501 from a Durbin-Watson test of autocorrelation of residuals. CQR estimates of the SEM of  $\beta_{0i}$  are also  
502 depicted but are mostly obscured by the point symbols.

503

504 Figure 3: A) Adjusted BMI density in  $FH_1$  by quantile (grey bars) and kernel-smoothed (black line)  
505 with fits to a three component normal mixture distribution. B) Estimated contributions in  $FH_1$  of the  
506 components of the mixture distribution to the prevalence (mixture coefficients,  $\lambda$ ) and variance of  
507 adjusted BMI.

## Segregation of Familial Obesity Risk

508 Figure 4: Effects of diabetes family history ( $FH_{0/1}$ ) on linear secular trends in age-, gender- and  
509 race/ethnicity-adjusted BMI mean  $\pm$  sem (A) and standard deviation  $\pm$  sem (B). Parameter estimates  
510 with 95% CI were obtained in ANCOVA models by stratified bootstrap resampling of all non-  
511 diabetic individuals (see Methods). Dotted lines enclose 95% CI on fitted values at each point;  $\beta =$   
512 regression slope vs. time ( $\text{kg}/\text{m}^2$  per year);  $\Delta\beta = \beta_{FH1} - \beta_{FH0}$  (95%CI).  
513

514 Tables

**Table 1: Participants by diabetes status (DM<sub>0</sub>/DM<sub>1</sub>)**

|                                                    | NHANES cycle |            |            |             | p <sup>†</sup>          |
|----------------------------------------------------|--------------|------------|------------|-------------|-------------------------|
|                                                    | All cycles   | 1999-2000  | 2005-2006  | 2013-2014   |                         |
| <b>DM<sub>0</sub></b>                              |              |            |            |             |                         |
| n                                                  | 9102         | 2865       | 3076       | 3161        | -                       |
| Gender (F%)                                        | 53           | 55         | 54         | 52          | 0.06                    |
| Race/Ethnicity (%)<br>(MA/OH/NHW/NHB) <sup>‡</sup> | 23/8/46/23   | 30/7/44/20 | 24/4/49/24 | 16/11/48/25 | 7.8 x 10 <sup>-56</sup> |
| Age (yr): Mean                                     | 40.5         | 40.7       | 39.4       | 41.5        | 4.5 x 10 <sup>-9</sup>  |
| SD                                                 | 13.2         | 13.2       | 13         | 13.2        | 0.63                    |
| BMI (kg/m <sup>2</sup> ): Mean                     | 28.7         | 28.3       | 28.6       | 29.2        | 4.6 x 10 <sup>-9</sup>  |
| SD                                                 | 6.6          | 6.3        | 6.4        | 7.1         | 1.2 x 10 <sup>-11</sup> |
| Diabetes Family History<br>(Y%)                    | 36           | 29         | 42         | 38          | 4.1 x 10 <sup>-25</sup> |
| Current smoking<br>(%, Y/N/missing)                | 25/20/55     |            |            |             | -                       |
| <b>DM<sub>1</sub></b>                              |              |            |            |             |                         |
| n (%)                                              | 793 (8.0)    | 211 (6.9)  | 252 (7.6)  | 330 (9.5)   | 0.0003                  |
| Age at Diagnosis (yr)                              | 43.6         | 44.3       | 42.9       | 43.6        | 0.47                    |

515

516 † Cycle effects (p) by ANOVA (age), ANCOVA (BMI), Bartlett's test (SD's) and Chi-squared test for categorical

517 variables.

518 ‡ MA = Mexican American, OH = Other Hispanic, NHW = Non-Hispanic White, NHB = Non-Hispanic Black

519 \* Adjusted for age, gender and race/ethnicity in a linear model (see Table S1).

520



521

**Table 2: Three-component normal mixture distribution fits to adjusted BMI by FH and DM status<sup>Y</sup>**

|                | Component | DM <sub>0</sub> |                                  | DM <sub>1</sub> |
|----------------|-----------|-----------------|----------------------------------|-----------------|
|                |           | FH <sub>0</sub> | FH <sub>1</sub>                  |                 |
| mean           | 1         | *               | 25.8±1.0                         | *               |
|                | 2         | *               | 32.1±1.8                         | *               |
|                | 3         | *               | 40.6±2.5                         | *               |
| sd             | 1         | 3.8             | 3.8±0.9                          | 3.7             |
|                | 2         | 5.7             | 5.1±1.2                          | 4.5             |
|                | 3         | 10              | 8.2±0.8                          | 8.4             |
| λ              | 1         | 0.67            | 0.52±0.16                        | 0.28            |
|                | 2         | 0.29            | 0.37±0.15                        | 0.47            |
|                | 3         | 0.04            | 0.11±0.06                        | 0.25            |
| q <sup>†</sup> | -         | 0.18            | 0.30±0.10<br>(0.37) <sup>§</sup> | 0.49            |

522

523 <sup>Y</sup> ± bootstrap standard error for FH<sub>1</sub> only

524 \* Means in FH<sub>0</sub> and DM<sub>1</sub> constrained to fitted values in FH<sub>1</sub>

525 <sup>†</sup> Calculated risk allele frequency in an additive Mendelian model of large effects

526 <sup>§</sup> Predicted from DM<sub>1</sub> mating randomly into the full sample.

527

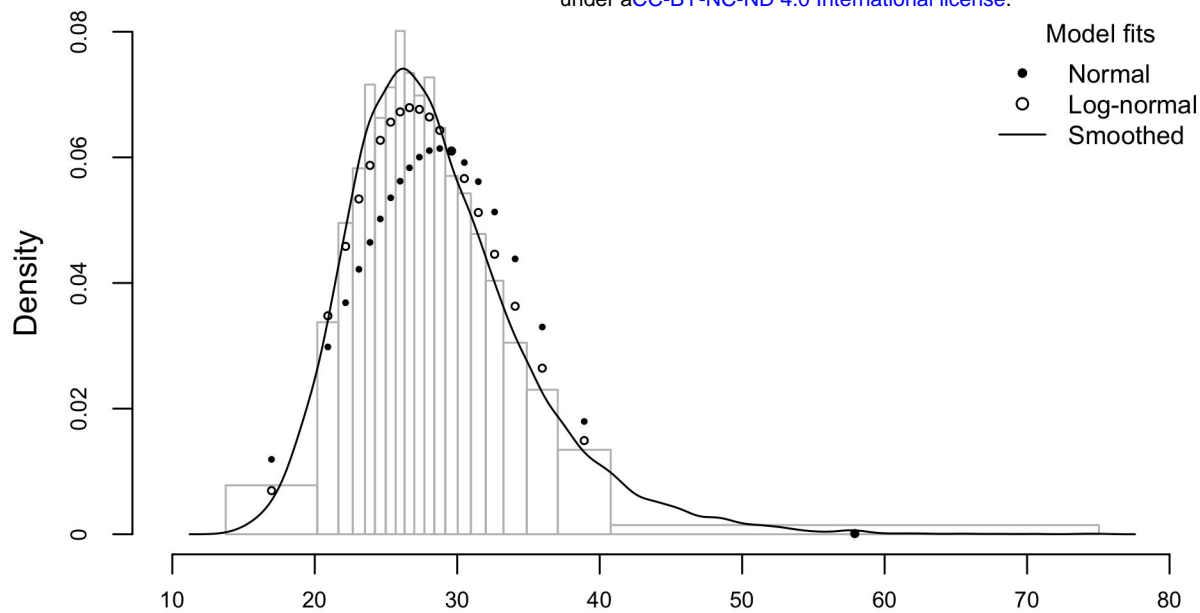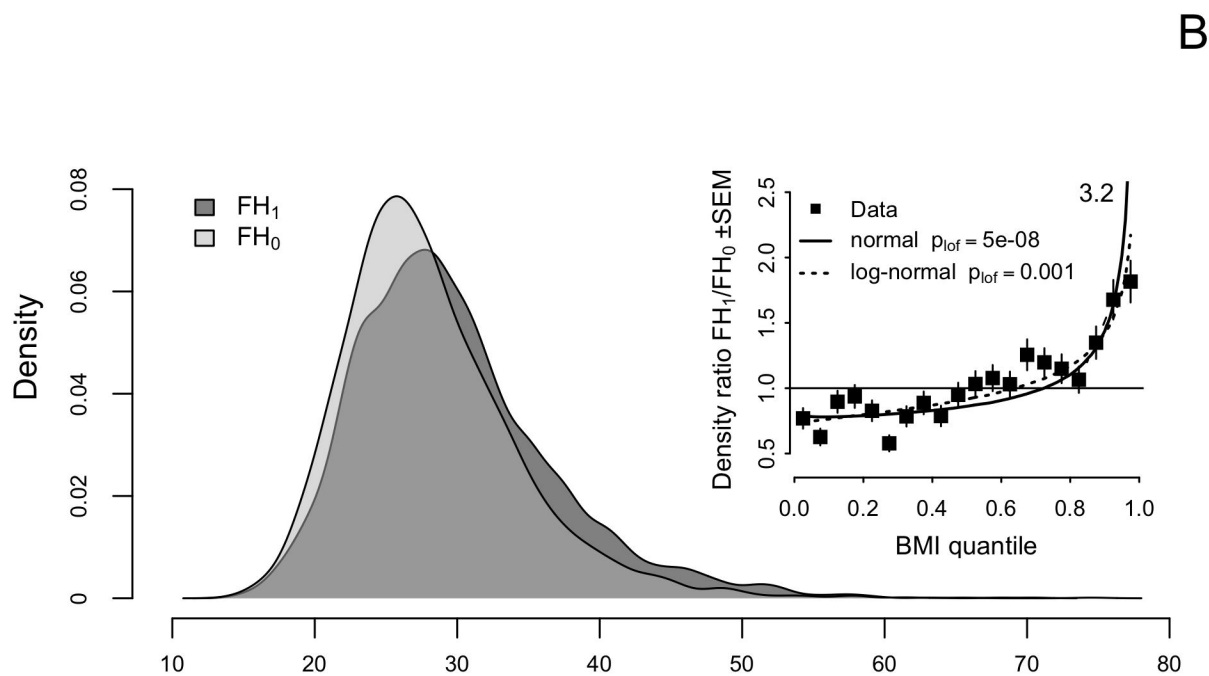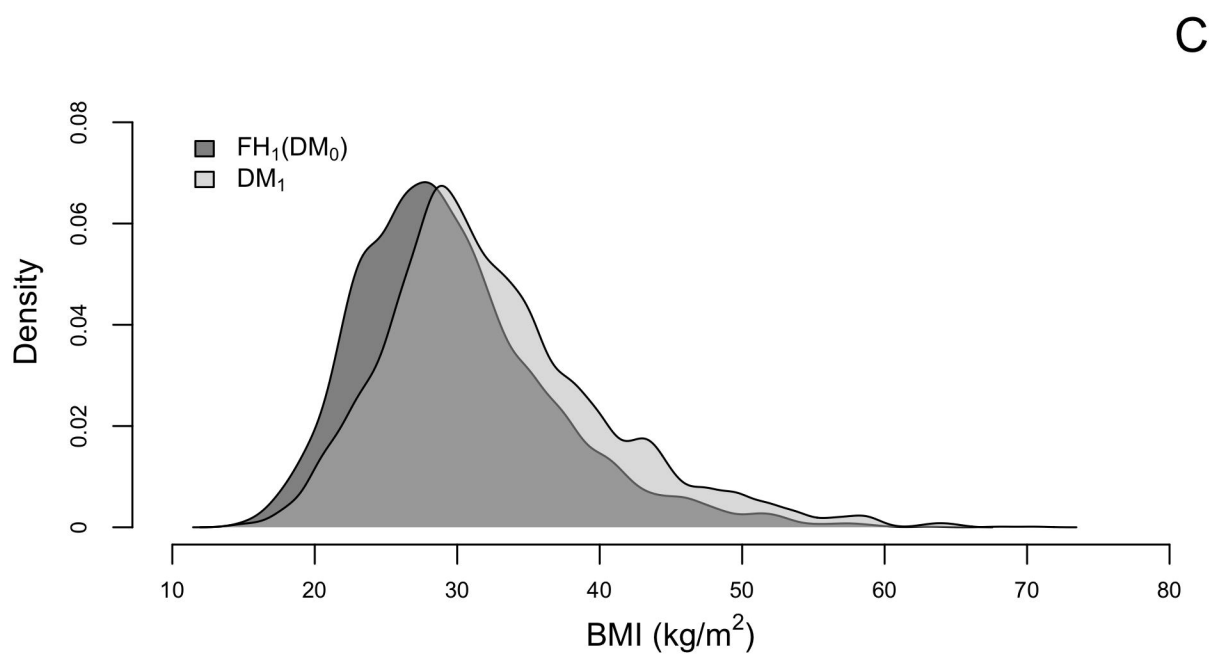

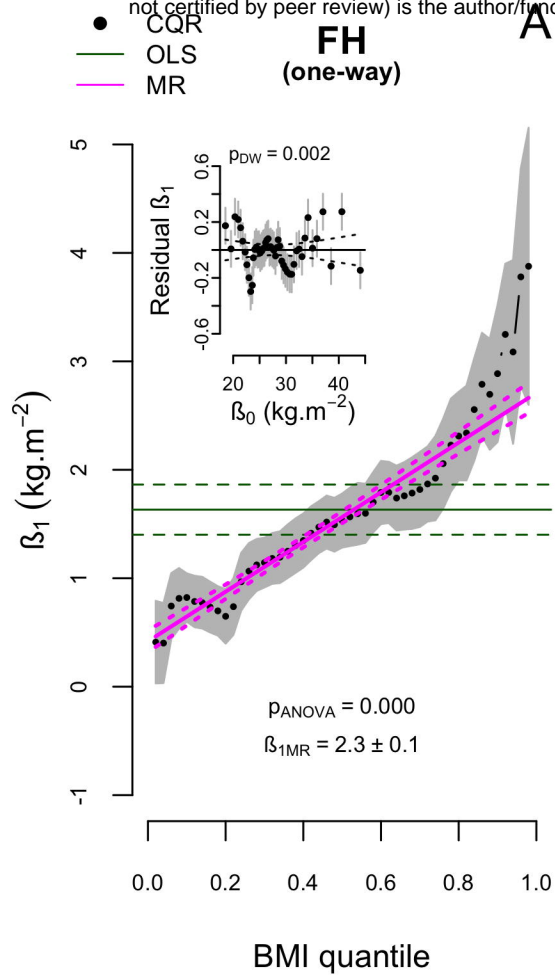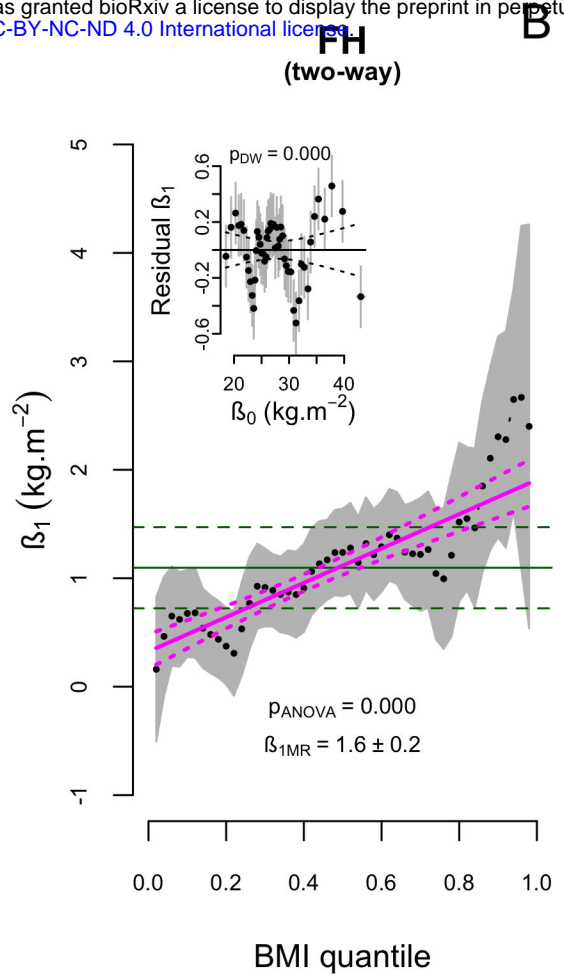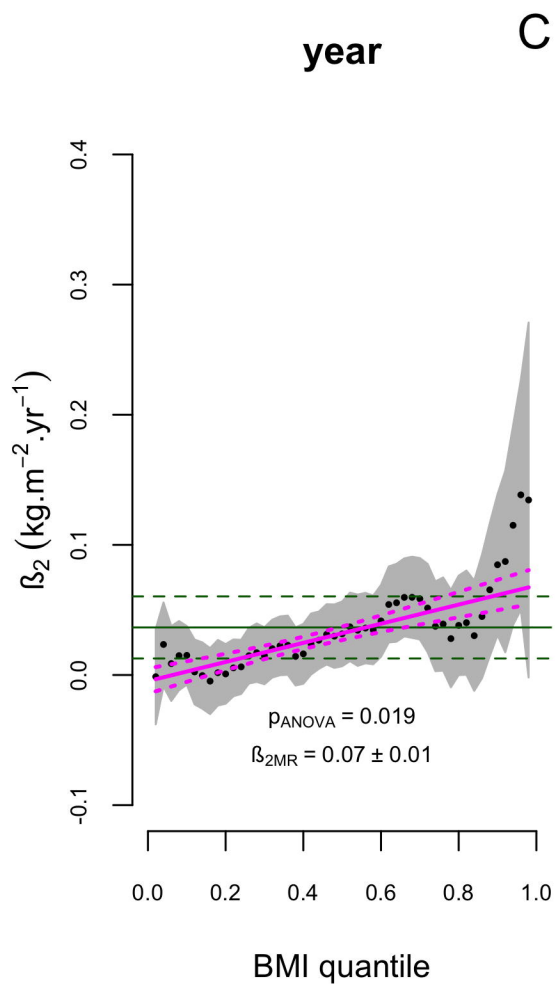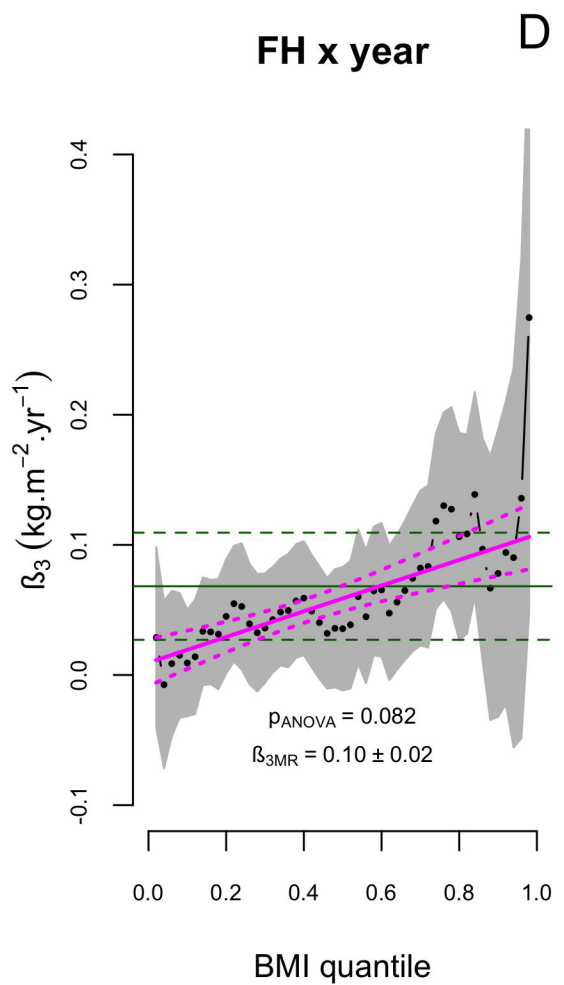

A

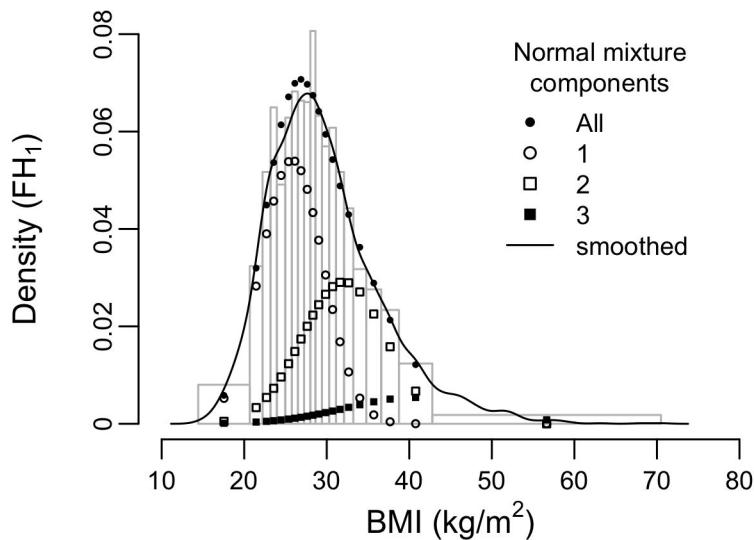

B

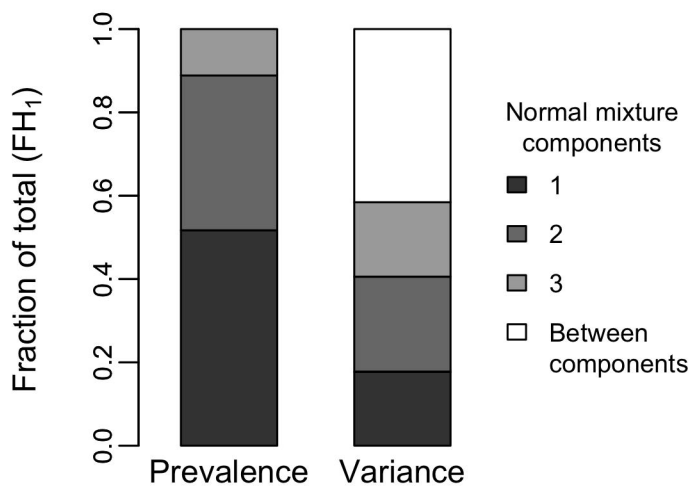

A

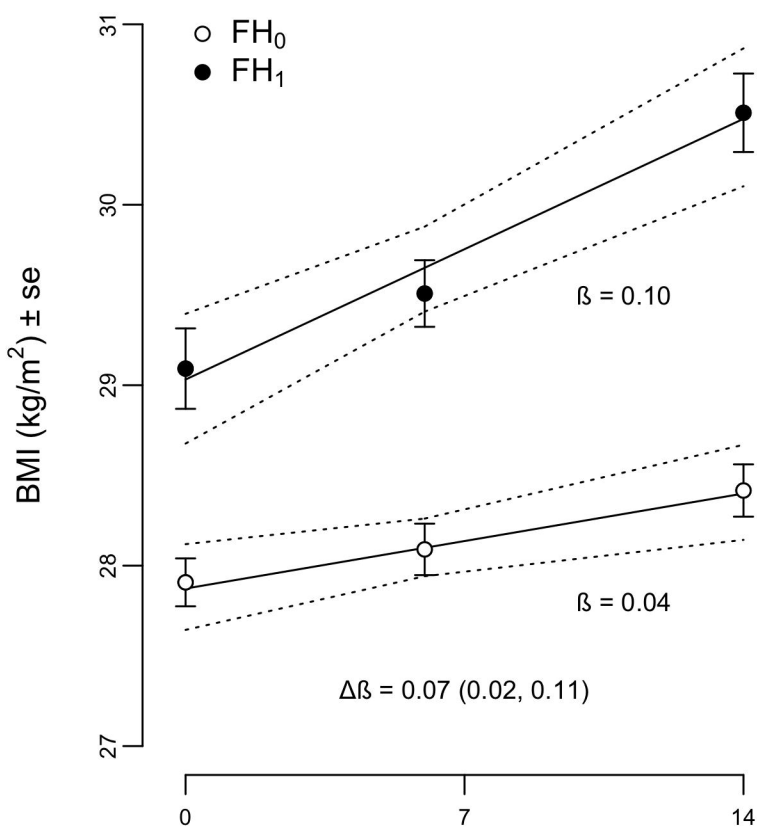

B

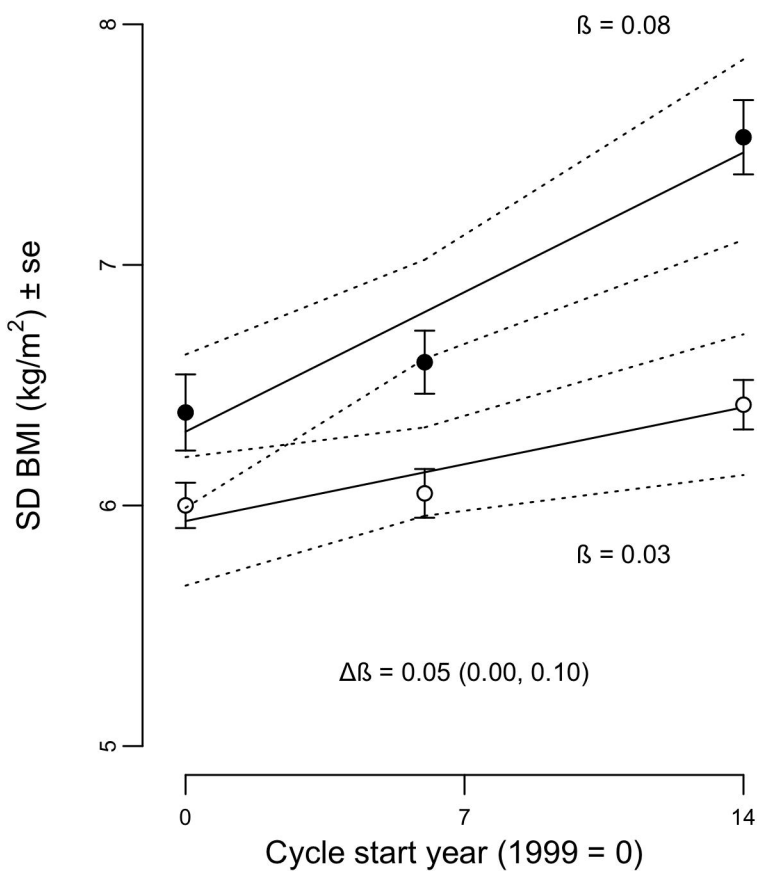

Source: https://www.biorxiv.org/content/10.1101/749606v3.full.pdf
